# Supplementary material
Source: PubMed Central journal article supplement (PMC5507213)
Supplement: NIHMS874578-supplement-Supplementary_Table.pdf [file NIHMS874578-supplement-Supplementary_Table.pdf]

**Supplementary table S1.** *Longitudinal study characteristics, latent class models and stability*

| Study ID                    | N     | Duration (Years) | Num of waves | Uniform Gap between waves | Including Pregnancy | Analysis | Num of Classes | % of Time-Stable Classes | Entropy | PP <sup>1</sup> |
|-----------------------------|-------|------------------|--------------|---------------------------|---------------------|----------|----------------|--------------------------|---------|-----------------|
| Parade et al. (2014)        | 98    | 0.46             | 4            | yes                       | yes                 | LGCM     | 2              | 50                       | ---     | ---             |
| Glasheen et al. (2013)      | 577   | 1.5              | 5            | no                        | yes                 | GMM      | 2              | 100                      | ---     | 0.69-0.81       |
| Giallo et al. (2014)        | 4879  | 6                | 4            | no                        | no                  | LGM      | 2              | 100                      | 0.89    | 0.92-0.98       |
| Kingsbury et al. (2015)     | 2991  | 21               | 4            | no                        | no                  | K-means  | 2              | 50                       | ---     | ---             |
| Christensen et al. (2011)   | 215   | 1.35             | 5            | no                        | yes                 | GMM      | 3              | 33                       | 0.83    | ---             |
| Ramos-Marcuse et al. (2010) | 181   | 2                | 3            | no                        | no                  | LGCM     | 3              | 100                      | ---     | ---             |
| Ashman et al. (2008)        | 159   | 5                | 5            | yes                       | no                  | GMM      | 3              | 66                       | 0.95    | 0.97-1.0        |
| Barker (2013)               | 12151 | 3                | 5            | yes                       | yes                 | LLC      | 3              | 100                      | 0.81    | ---             |
| Giallo et al. (2015a)       | 4164  | 7                | 4            | yes                       | no                  | LCGM     | 3              | 66                       | 0.86    | 0.86-0.96       |
| Giallo et al. (2015b)       | 1085  | 4.5              | 8            | no                        | yes                 | LCGM     | 3              | 66                       | 0.84    | 0.89-0.95       |
| Najman et al. (2016)        | 6753  | 27               | 6            | no                        | yes                 | LCGM     | 3              | 66                       | ---     | 0.84-0.89       |
| Kuo et al. (2014)           | 139   | 0.6              | 5            | no                        | yes                 | LGCM     | 3              | 100                      | ---     | 0.87-0.91       |
| Luoma et al. (2015)         | 329   | 17               | 6            | no                        | yes                 | LGCM     | 4              | 75                       | ---     | ---             |
| Cents et al. (2013)         | 4167  | 2.5              | 4            | no                        | yes                 | LCGM     | 4              | 75                       | ---     | 0.71-0.92       |
| Kuo et al. (2012)           | 121   | 0.25             | 4            | no                        | yes                 | LGCM     | 4              | 25                       | ---     | 0.87-0.95       |
| Matijasevich et al. (2015)  | 4231  | 6                | 5            | no                        | no                  | LCGM     | 5              | 60                       | ---     | 0.78-0.87       |

|                                       |       |     |    |    |     |      |   |    |      |           |
|---------------------------------------|-------|-----|----|----|-----|------|---|----|------|-----------|
| van der Waerden et al. (2015a, 2015b) | 1807  | 5   | 8  | no | yes | LGCM | 5 | 40 | ---  | 0.81-0.95 |
| Mora et al. (2009)                    | 1735  | 2.5 | 4  | no | yes | GMM  | 5 | 40 | 0.79 | 0.78-0.91 |
| Hammerton et al. (2015)               | 10559 | 12  | 10 | no | yes | LCGM | 5 | 80 | 0.8  | 0.78-0.92 |
| Campbell et al. (2009)                | 1357  | 12  | 10 | no | no  | GMM  | 5 | 40 | 0.81 | ---       |
| Campbell et al. (2007)                | 1261  | 7   | 7  | no | no  | LGCM | 6 | 50 | 0.86 | 0.80-0.92 |

<sup>1</sup> PP = posterior probability

Note. LCA, latent class analysis; LGCM, latent growth curve model; GBTM, group-based trajectory model; GMM, growth mixture model; LGM, latent growth model; LCGM, latent class growth model
